# Supplementary material for: Assessing the potentiality of algorithms and artificial intelligence adoption to disrupt patient primary care with a safer and faster medication management: a systematic review protocol
Source: HighWire-hosted journal article supplement (doi:10.1136/bmjopen-2021-057399), 2022-05-01
Supplement: bmjopen-2021-057399supp001_data_supplement.pdf [file bmjopen-2021-057399supp001_data_supplement.pdf]

## Supplementary File 1

### Search string

#### Pubmed

("primary care" OR "ambulatory care" OR "outpatient care" OR "basic health care" OR "basic health-care" OR "basic healthcare" OR "day-to-day health care" OR "first aid" OR "initial medical care" OR " local doctors" OR "local doctor" OR "primary medical care" OR "primary health-care" OR "primary healthcare" OR "general practitioner" OR "general practitioners" OR "GP" OR "GPs" OR "family medicine" OR "general internal medicine" OR "general paediatrics" OR "primary care physician" OR "continuity of care" OR "first aid station" OR "first-aid station" OR "medical station" OR "home care" OR "home assistance" OR "home help")

AND ("artificial intelligence"[MeSH] OR "algorithms" OR "electronic prescribing" OR "Telehealth" OR "machine learning" OR "deep learning" OR "neural networks" OR "Computational Intelligence" OR "Machine Intelligence" OR "Computer Reasoning" OR "telemedicine"[MeSH] OR "m-health" OR "mhealth" OR "mobile health" OR "ehealth" OR "e-health" OR "digital health")

AND ( "Medication use" OR "adverse drug events" OR "drug prescription" OR "medication errors"[MeSH] OR "prescription errors" OR "medication error" OR "medication adverse event" OR "drug error" OR "medication administration" OR "medication prescription" OR "medication use" OR "prescribing error" OR "dispensing error" OR "omission error" OR "wrong time error" OR "monitoring error" OR "compliance error" )

#### Cochrane

| ID  | Search Hits                |
|-----|----------------------------|
| #1  | primary care 104889        |
| #2  | ambulatory care 9348       |
| #3  | outpatient care 15467      |
| #4  | basic health care 3678     |
| #5  | basic health-care 1677     |
| #6  | basic healthcare 1432      |
| #7  | day-to-day health care 462 |
| #8  | first aid 4818             |
| #9  | initial medical care 9351  |
| #10 | local doctors 912          |
| #11 | local doctor 1043          |

|     |                           |       |
|-----|---------------------------|-------|
| #12 | primary medical care      | 38283 |
| #13 | primary health-care       | 29122 |
| #14 | primary healthcare        | 14360 |
| #15 | general practitioner      | 6570  |
| #16 | general practitioners     | 5850  |
| #17 | GP                        | 10821 |
| #18 | GPs                       | 3516  |
| #19 | family medicine           | 11532 |
| #20 | general internal medicine | 10061 |
| #21 | general paediatrics       | 2610  |
| #22 | primary care physician    | 9669  |
| #23 | continuity of care        | 1867  |
| #24 | medical station           | 548   |
| #25 | home care                 | 25285 |
| #26 | home assistance           | 1977  |
| #27 | home help                 | 4992  |
| #28 | m-health                  | 1541  |
| #29 | mhealth                   | 1683  |
| #30 | mobile health             | 6529  |
| #31 | ehealth                   | 1492  |
| #32 | e-health                  | 1507  |
| #33 | digital health            | 4314  |
| #34 | artificial intelligence   | 832   |
| #35 | algorithms                | 6345  |
| #36 | electronic prescribing    | 1197  |
| #37 | Telehealth                | 2191  |
| #38 | machine learning          | 1567  |
| #39 | deep learning             | 914   |

|     |                                                                                                                                                                                  |        |
|-----|----------------------------------------------------------------------------------------------------------------------------------------------------------------------------------|--------|
| #40 | neural networks                                                                                                                                                                  | 1133   |
| #41 | Machine Intelligence                                                                                                                                                             | 216    |
| #42 | Computer Reasoning                                                                                                                                                               | 296    |
| #43 | telemedicine                                                                                                                                                                     | 4543   |
| #44 | adverse drug events                                                                                                                                                              | 84274  |
| #45 | drug prescription                                                                                                                                                                | 8231   |
| #46 | medication errors                                                                                                                                                                | 2506   |
| #47 | prescription errors                                                                                                                                                              | 749    |
| #48 | medication error                                                                                                                                                                 | 3113   |
| #49 | medication adverse event                                                                                                                                                         | 6904   |
| #50 | drug error                                                                                                                                                                       | 8040   |
| #51 | medication administration                                                                                                                                                        | 26775  |
| #52 | medication prescription                                                                                                                                                          | 3836   |
| #53 | wrong medication use                                                                                                                                                             | 332    |
| #54 | prescribing error                                                                                                                                                                | 551    |
| #55 | drug dispensing error                                                                                                                                                            | 94     |
| #56 | drug omission error                                                                                                                                                              | 219    |
| #57 | drug monitoring error                                                                                                                                                            | 1567   |
| #58 | drug compliance error                                                                                                                                                            | 1534   |
| #59 | #1 OR #2 OR #3 OR #4 OR #5 OR #6 OR #7 OR #8 OR #9 OR #10 OR #11 OR #12 OR #13 OR #14 OR #15 OR #16 OR #17 OR #18 OR #19 OR #20 OR #21 OR #22 OR #23 OR #24 OR #25 OR #26 OR #27 | 163013 |
| #60 | #28 OR #29 OR #30 OR #31 OR #32 OR #33#34 OR #35 OR #36 OR #37 OR #38 OR #39 OR #40 OR #41 OR #42 OR #43                                                                         | 26710  |
| #61 | #44 OR #45 OR #46 OR #47 OR #48 OR #49 OR #50 OR #51 OR #52 OR #53 OR #54 OR #55 OR #56 #57 OR #58                                                                               | 118327 |
| #62 | #59 AND #60 AND #61                                                                                                                                                              | 2450   |

## WoS

("primary care" OR "ambulatory care" OR "outpatient care" OR "basic health care" OR "basic health-care" OR "basic healthcare" OR "day-to-day health care" OR "first aid" OR "initial medical care" OR " local doctors" OR "local doctor" OR "primary medical care" OR "primary health-care" OR "primary healthcare" OR "general practitioner" OR "general practitioners" OR "GP" OR "GPs" OR "family medicine" OR "general internal medicine" OR "general paediatrics" OR "primary care physician" OR "continuity of care" OR "first aid station" OR "first-aid station" OR "medical station" OR "home care" OR "home assistance" OR "home help")

AND ("artificial intelligence" OR "algorithms" OR "electronic prescribing" OR "Telehealth" OR "machine learning" OR "deep learning" OR "neural networks" OR "Computational Intelligence" OR "Machine Intelligence" OR "Computer Reasoning" OR "telemedicine" OR "m-health" OR "mhealth" OR "mobile health" OR "ehealth" OR "e-health" OR "digital health")

AND ( "Medication use" OR "adverse drug events" OR "drug prescription" OR "medication errors" OR "prescription errors" OR "medication error" OR "medication adverse event" OR "drug error" OR "medication administration" OR "medication prescription" OR "medication use" OR "prescribing error" OR "dispensing error" OR "omission error" OR "wrong time error" OR "monitoring error" OR "compliance error" )
